# Supplementary material for: Rituximab Selectively Suppresses Specific Islet Antibodies
Source: PubMed Central journal article supplement — Diabetes. 2011 Sep 16;60(10):2560–5. doi: 10.2337/db11-0674 (PMC3178300; doi:10.2337/db11-0674), 2011-09-16
Supplement: supp_db11-0674_DB110674SupplementaryData.pdf [file supp_db11-0674_DB110674SupplementaryData.pdf]

## SUPPLEMENTARY DATA

### **Type 1 Diabetes TrialNet Anti-CD20 Study Group**

Steering Committee: Jay S. Skyler (University of Miami Diabetes Research Institute), Chairman; Mark Anderson (University of California San Francisco), Dorothy Becker (University of Pittsburgh), Christophe Benoist (Joslin Diabetes Center), Penelope Bingley (University of Bristol), Emanuele Bosi (San Raffaele Hospital), H. Peter Chase (University of Colorado Barbara Davis Center for Childhood Diabetes), Michael Clare-Salzler (University of Florida), Peter Colman (Walter and Eliza Hall Institute of Medical Research), George S. Eisenbarth (University of Colorado Barbara Davis Center for Childhood Diabetes), C. Garrison Fathman (Stanford University), Stephen Gitelman (University of California San Francisco), Robin Goland (Columbia University), Peter Gottlieb (University of Colorado Barbara Davis Center for Childhood Diabetes), Gilman Grave (NICHD), Carla Greenbaum (Benaroya Research Institute), Leonard Harrison (Walter and Eliza Hall Institute of Medical Research), Kevan Herold (Yale University), Richard Insel (Juvenile Diabetes Research Foundation), Francine Kaufman (Childrens Hospital Los Angeles), Jeffrey P. Krischer (University of South Florida), Ellen Leschek (NIDDK), Jeffrey Mahon (University of Western Ontario), Jennifer Marks (University of Miami Diabetes Research Institute), Antoinette Moran (University of Minnesota), Kirsti Nanto-Salonen (Hospital District of Southwest Finland), Gerald Nepom (Benaroya Research Institute), Tihamer Orban (Joslin Diabetes Center), Jerry P. Palmer (University of Washington), Robertson Parkman (Childrens Hospital Los Angeles), Mark Peakman (Guy's, King's, and St. Thomas' School of Medicine), Mark Pescovitz (Indiana University), John Peyman (NIAID), Alberto Pugliese (University of Miami Diabetes Research Institute), Philip Raskin (University of Texas Southwestern Medical School), Henry Rodriguez (Indiana University), Desmond Schatz (University of Florida), Robert Sherwin (Yale University), Mark Siegelman (University of Texas Southwestern Medical School), Olli Simell (Hospital District of Southwest Finland), Massimo Trucco (University of Pittsburgh), John Wagner (University of Minnesota), Diane Wherrett (University of Toronto), Darrell Wilson (Stanford University), William Winter (University of Florida), Anette Ziegler (Institut für Diabetesforschung), Judith Fradkin (NIDDK, ex-officio). Past Members: Jeffrey Bluestone (University of California San Francisco), David Brown (University of Minnesota), Catherine Cowie (NIDDK), Bernard Hering (University of Minnesota), Stanley Jordan (Cedars-Sinai Medical Center), John M. Lachin (George Washington University), John Ridge (NIAID).

Executive Committee: Jay S. Skyler, Carla J. Greenbaum, Jeffrey P. Krischer, Ellen Leschek, John Peyman, Lisa Rafkin-Mervis (University of Miami Diabetes Research Institute), Peter Savage (NIDDK), Lisa Spain (NIDDK). Past Members: Catherine Cowie, Mary Foulkes (George Washington University), Heidi Krause-Steinrauf (George Washington University), John M. Lachin, Saul Malozowski (NIDDK), John Ridge, Stephanie J. Zafonte (George Washington University).

### **For the Anti-CD20 Study, the following individuals were involved:**

Chairman's Office: Jay S. Skyler, Carla J. Greenbaum, Norma S. Kenyon, Lisa Rafkin-Mervis, Jay M. Sosenko

Coordinating Center (at the time of the study): John M. Lachin, Heidi Krause-Steinrauf, Paula F. McGee, Kimberly Hess, Erica Raiden

NIDDK Staff: Judith Fradkin, Ellen Leschek, Peter Savage, Lisa Spain

## SUPPLEMENTARY DATA

Data Safety and Monitoring Board: Emily Blumberg (University of Pennsylvania), Chair; Jonathan Braun (University of California Los Angeles), Lori Laffel (Joslin Diabetes Center), Ali Naji (University of Pennsylvania), Jorn Nerup (University of Copenhagen), Trevor Orchard (University of Pittsburgh), Anastasios Tsiatis (North Carolina State University), Robert Veatch (Georgetown University), Dennis Wallace (Research Triangle Institute). Past Members: Ake Lernmark (Lund University), Bernard Lo (University of California San Francisco), Herman Mitchell (Rho Inc.), Michael Steffes (University of Minnesota), Bernard Zinman (University of Toronto).

Infectious Disease Safety Committee: Brett Loechelt (Children's National Medical Center) (Medical Monitor), Lindsey Baden (Harvard University), Michael Green (University of Pittsburgh), Adriana Weinberg (University of Colorado)

Laboratory Directors: George S. Eisenbarth, Santica Marcovina (University of Washington), Jerry P. Palmer, Adriana Weinberg, William Winter, Liping Yu (University of Colorado Barbara Davis Center for Childhood Diabetes)

PhiX Sub-Study: Hans D Ochs (University of Washington), Troy R Torgerson (University of Washington), Elizabeth Ocheltree (University of Washington)

Neurological Consultants: Joseph Berger (University of Kentucky), Igor Koralnik (Harvard University), Kenneth Tyler (University of Colorado), Richard T. Leschek (Frederick, MD)

Protocol Advisory Committee: Mark D. Pescovitz (Chair), Bruce Buckingham, C. Garrison Fathman, Stephen Gitelman, Kevan Herold, Norma Kenyon, Heidi Krause-Steinrauf, John Looney (University of Rochester), Joan Lunney (USDA), David Ng (University of California San Francisco), Henry Rodriguez, Lisa Spain; Ex-officio: Carla Greenbaum, John M. Lachin, Ellen Leschek, Jay S. Skyler; Kim Owens (liaison).

Clinical Center Staff involved in this Protocol:

Benaroya Research Institute, Seattle, Washington: Carla Greenbaum, Jennifer Bollyky, Srinath Sanda, Marli McCulloch-Olson, Deborah Hefty, Christine Webber, Kristen Kuhns, Carynn Murphy

Columbia University, New York: Robin Goland, Ellen Greenberg, Mary Pat Gallagher, Jeniece Trast, Mary Chan

Indiana University, Indianapolis: Henry Rodriguez, Mark Pescovitz, Lyla Christner, Maria Nicholson, Martha Mendez

Stanford University, California: Darrell M. Wilson, Bruce A. Buckingham, Tandy Aye, Trudy Esrey, Adriana Soto, Jennifer Perry, Bonita Baker, Alison Rigby, Kristin Riley, Maya Chatav, Barbara Berry

University of California San Francisco: Stephen E. Gitelman, Stephen M. Rosenthal, Mark Anderson, Saleh Adi, Kathleen Breen, Celia Hamilton

## SUPPLEMENTARY DATA

University of Colorado Barbara Davis Center for Childhood Diabetes, Aurora, Colorado: Peter Gottlieb, H. Peter Chase, Melissa Rawley-Payne, Susan George, Laurie Weiner

University of Florida, Gainesville, FL: Desmond Schatz, Michael Haller, Michael Clare-Salzler, Roberta Cook, Diane Mancini, Annie Abraham, Elena Hicks, Gloria Cole

University of Miami Diabetes Research Institute, Miami, Florida: Jennifer B. Marks, Alberto Pugliese, Della Matheson, Carlos Blaschke, Luz Arazo, Mario Cisneros

University of Minnesota, Minneapolis: Antoinette Moran, John Wagner, Brandon Nathan, Mary Ann Boes

University of Pittsburgh, Pennsylvania: Dorothy Becker, Frederico Toledo, Karen Riley, Kelly Delallo, Kym Smith

University of Texas Southwestern Medical School: Philip Raskin, Perrin White, Bryan Dickson, Soumya Adhikari, Mark Siegelman, Marilyn Alford, Nenita Torres, Tauri Harden, Lourdes Pruneda, Erica Cordova

University of Toronto: Diane Wherrett, Lesley A. Eisel, Brenda Ahenkorah, Natasha Razack, Mithula Sriskandarajah
